# Supplementary material
Source: ML conference proceedings conference paper supplement (https://proceedings.neurips.cc/paper_files/paper/2021/hash/78ccad7da4c2fc2646d1848e965794c5-Abstract.html)
Supplement: Supplementary file 1 [file 78ccad7da4c2fc2646d1848e965794c5-Supplemental.zip]

Archive with 104 entries (94 files):
- supplementary-material-linear-and-kernel-heavy-hitters-jan-2022/
- __MACOSX/._supplementary-material-linear-and-kernel-heavy-hitters-jan-2022
- supplementary-material-linear-and-kernel-heavy-hitters-jan-2022/.DS_Store
- __MACOSX/supplementary-material-linear-and-kernel-heavy-hitters-jan-2022/._.DS_Store
- supplementary-material-linear-and-kernel-heavy-hitters-jan-2022/Appendix F Experiments/
- __MACOSX/supplementary-material-linear-and-kernel-heavy-hitters-jan-2022/._Appendix F Experiments
- supplementary-material-linear-and-kernel-heavy-hitters-jan-2022/classification_heavy_hitters_neurips_2021_january_2022_supplementary.pdf
- __MACOSX/supplementary-material-linear-and-kernel-heavy-hitters-jan-2022/._classification_heavy_hitters_neurips_2021_january_2022_supplementary.pdf
- supplementary-material-linear-and-kernel-heavy-hitters-jan-2022/Point Query Experiments (Main Paper)/
- __MACOSX/supplementary-material-linear-and-kernel-heavy-hitters-jan-2022/._Point Query Experiments (Main Paper)
- supplementary-material-linear-and-kernel-heavy-hitters-jan-2022/Appendix F Experiments/.DS_Store
- __MACOSX/supplementary-material-linear-and-kernel-heavy-hitters-jan-2022/Appendix F Experiments/._.DS_Store
- supplementary-material-linear-and-kernel-heavy-hitters-jan-2022/Appendix F Experiments/download_datasets
- __MACOSX/supplementary-material-linear-and-kernel-heavy-hitters-jan-2022/Appendix F Experiments/._download_datasets
- supplementary-material-linear-and-kernel-heavy-hitters-jan-2022/Appendix F Experiments/online_logistic_regression.py
- __MACOSX/supplementary-material-linear-and-kernel-heavy-hitters-jan-2022/Appendix F Experiments/._online_logistic_regression.py
- supplementary-material-linear-and-kernel-heavy-hitters-jan-2022/Appendix F Experiments/README
- __MACOSX/supplementary-material-linear-and-kernel-heavy-hitters-jan-2022/Appendix F Experiments/._README
- supplementary-material-linear-and-kernel-heavy-hitters-jan-2022/Appendix F Experiments/dataset.py
- __MACOSX/supplementary-material-linear-and-kernel-heavy-hitters-jan-2022/Appendix F Experiments/._dataset.py
- supplementary-material-linear-and-kernel-heavy-hitters-jan-2022/Appendix F Experiments/main.py
- __MACOSX/supplementary-material-linear-and-kernel-heavy-hitters-jan-2022/Appendix F Experiments/._main.py
- supplementary-material-linear-and-kernel-heavy-hitters-jan-2022/Point Query Experiments (Main Paper)/.DS_Store
- __MACOSX/supplementary-material-linear-and-kernel-heavy-hitters-jan-2022/Point Query Experiments (Main Paper)/._.DS_Store
- supplementary-material-linear-and-kernel-heavy-hitters-jan-2022/Point Query Experiments (Main Paper)/.vscode/
- __MACOSX/supplementary-material-linear-and-kernel-heavy-hitters-jan-2022/Point Query Experiments (Main Paper)/._.vscode
- supplementary-material-linear-and-kernel-heavy-hitters-jan-2022/Point Query Experiments (Main Paper)/JLSketch/
- __MACOSX/supplementary-material-linear-and-kernel-heavy-hitters-jan-2022/Point Query Experiments (Main Paper)/._JLSketch
- supplementary-material-linear-and-kernel-heavy-hitters-jan-2022/Point Query Experiments (Main Paper)/.vscode/settings.json
- __MACOSX/supplementary-material-linear-and-kernel-heavy-hitters-jan-2022/Point Query Experiments (Main Paper)/.vscode/._settings.json
- supplementary-material-linear-and-kernel-heavy-hitters-jan-2022/Point Query Experiments (Main Paper)/JLSketch/CMakeLists.txt
- __MACOSX/supplementary-material-linear-and-kernel-heavy-hitters-jan-2022/Point Query Experiments (Main Paper)/JLSketch/._CMakeLists.txt
- supplementary-material-linear-and-kernel-heavy-hitters-jan-2022/Point Query Experiments (Main Paper)/JLSketch/.DS_Store
- __MACOSX/supplementary-material-linear-and-kernel-heavy-hitters-jan-2022/Point Query Experiments (Main Paper)/JLSketch/._.DS_Store
- supplementary-material-linear-and-kernel-heavy-hitters-jan-2022/Point Query Experiments (Main Paper)/JLSketch/include/
- __MACOSX/supplementary-material-linear-and-kernel-heavy-hitters-jan-2022/Point Query Experiments (Main Paper)/JLSketch/._include
- supplementary-material-linear-and-kernel-heavy-hitters-jan-2022/Point Query Experiments (Main Paper)/JLSketch/Datasets/
- __MACOSX/supplementary-material-linear-and-kernel-heavy-hitters-jan-2022/Point Query Experiments (Main Paper)/JLSketch/._Datasets
- supplementary-material-linear-and-kernel-heavy-hitters-jan-2022/Point Query Experiments (Main Paper)/JLSketch/README.md
- __MACOSX/supplementary-material-linear-and-kernel-heavy-hitters-jan-2022/Point Query Experiments (Main Paper)/JLSketch/._README.md
- supplementary-material-linear-and-kernel-heavy-hitters-jan-2022/Point Query Experiments (Main Paper)/JLSketch/build/
- __MACOSX/supplementary-material-linear-and-kernel-heavy-hitters-jan-2022/Point Query Experiments (Main Paper)/JLSketch/._build
- supplementary-material-linear-and-kernel-heavy-hitters-jan-2022/Point Query Experiments (Main Paper)/JLSketch/src/
- __MACOSX/supplementary-material-linear-and-kernel-heavy-hitters-jan-2022/Point Query Experiments (Main Paper)/JLSketch/._src
- supplementary-material-linear-and-kernel-heavy-hitters-jan-2022/Point Query Experiments (Main Paper)/JLSketch/include/binary_estimator.h
- __MACOSX/supplementary-material-linear-and-kernel-heavy-hitters-jan-2022/Point Query Experiments (Main Paper)/JLSketch/include/._binary_estimator.h
- supplementary-material-linear-and-kernel-heavy-hitters-jan-2022/Point Query Experiments (Main Paper)/JLSketch/include/topk.h
- __MACOSX/supplementary-material-linear-and-kernel-heavy-hitters-jan-2022/Point Query Experiments (Main Paper)/JLSketch/include/._topk.h
- supplementary-material-linear-and-kernel-heavy-hitters-jan-2022/Point Query Experiments (Main Paper)/JLSketch/include/logistic.h
- __MACOSX/supplementary-material-linear-and-kernel-heavy-hitters-jan-2022/Point Query Experiments (Main Paper)/JLSketch/include/._logistic.h
- supplementary-material-linear-and-kernel-heavy-hitters-jan-2022/Point Query Experiments (Main Paper)/JLSketch/include/jl_recovery_sketch.h
- __MACOSX/supplementary-material-linear-and-kernel-heavy-hitters-jan-2022/Point Query Experiments (Main Paper)/JLSketch/include/._jl_recovery_sketch.h
- supplementary-material-linear-and-kernel-heavy-hitters-jan-2022/Point Query Experiments (Main Paper)/JLSketch/include/dataset.h
- __MACOSX/supplementary-material-linear-and-kernel-heavy-hitters-jan-2022/Point Query Experiments (Main Paper)/JLSketch/include/._dataset.h
- supplementary-material-linear-and-kernel-heavy-hitters-jan-2022/Point Query Experiments (Main Paper)/JLSketch/include/util.h
- __MACOSX/supplementary-material-linear-and-kernel-heavy-hitters-jan-2022/Point Query Experiments (Main Paper)/JLSketch/include/._util.h
- supplementary-material-linear-and-kernel-heavy-hitters-jan-2022/Point Query Experiments (Main Paper)/JLSketch/include/countsketch.h
- __MACOSX/supplementary-material-linear-and-kernel-heavy-hitters-jan-2022/Point Query Experiments (Main Paper)/JLSketch/include/._countsketch.h
- supplementary-material-linear-and-kernel-heavy-hitters-jan-2022/Point Query Experiments (Main Paper)/JLSketch/include/heap.h
- __MACOSX/supplementary-material-linear-and-kernel-heavy-hitters-jan-2022/Point Query Experiments (Main Paper)/JLSketch/include/._heap.h
- supplementary-material-linear-and-kernel-heavy-hitters-jan-2022/Point Query Experiments (Main Paper)/JLSketch/include/black_box_reduction.h
- __MACOSX/supplementary-material-linear-and-kernel-heavy-hitters-jan-2022/Point Query Experiments (Main Paper)/JLSketch/include/._black_box_reduction.h
- supplementary-material-linear-and-kernel-heavy-hitters-jan-2022/Point Query Experiments (Main Paper)/JLSketch/include/logistic_sketch.h
- __MACOSX/supplementary-material-linear-and-kernel-heavy-hitters-jan-2022/Point Query Experiments (Main Paper)/JLSketch/include/._logistic_sketch.h
- supplementary-material-linear-and-kernel-heavy-hitters-jan-2022/Point Query Experiments (Main Paper)/JLSketch/include/hash.h
- __MACOSX/supplementary-material-linear-and-kernel-heavy-hitters-jan-2022/Point Query Experiments (Main Paper)/JLSketch/include/._hash.h
- supplementary-material-linear-and-kernel-heavy-hitters-jan-2022/Point Query Experiments (Main Paper)/JLSketch/Datasets/.DS_Store
- __MACOSX/supplementary-material-linear-and-kernel-heavy-hitters-jan-2022/Point Query Experiments (Main Paper)/JLSketch/Datasets/._.DS_Store
- supplementary-material-linear-and-kernel-heavy-hitters-jan-2022/Point Query Experiments (Main Paper)/JLSketch/Datasets/download_datasets
- __MACOSX/supplementary-material-linear-and-kernel-heavy-hitters-jan-2022/Point Query Experiments (Main Paper)/JLSketch/Datasets/._download_datasets
- supplementary-material-linear-and-kernel-heavy-hitters-jan-2022/Point Query Experiments (Main Paper)/JLSketch/build/.DS_Store
- __MACOSX/supplementary-material-linear-and-kernel-heavy-hitters-jan-2022/Point Query Experiments (Main Paper)/JLSketch/build/._.DS_Store
- supplementary-material-linear-and-kernel-heavy-hitters-jan-2022/Point Query Experiments (Main Paper)/JLSketch/build/plotting.py
- __MACOSX/supplementary-material-linear-and-kernel-heavy-hitters-jan-2022/Point Query Experiments (Main Paper)/JLSketch/build/._plotting.py
- supplementary-material-linear-and-kernel-heavy-hitters-jan-2022/Point Query Experiments (Main Paper)/JLSketch/build/run_experiments
- __MACOSX/supplementary-material-linear-and-kernel-heavy-hitters-jan-2022/Point Query Experiments (Main Paper)/JLSketch/build/._run_experiments
- supplementary-material-linear-and-kernel-heavy-hitters-jan-2022/Point Query Experiments (Main Paper)/JLSketch/src/util.cpp
- __MACOSX/supplementary-material-linear-and-kernel-heavy-hitters-jan-2022/Point Query Experiments (Main Paper)/JLSketch/src/._util.cpp
- supplementary-material-linear-and-kernel-heavy-hitters-jan-2022/Point Query Experiments (Main Paper)/JLSketch/src/.DS_Store
- __MACOSX/supplementary-material-linear-and-kernel-heavy-hitters-jan-2022/Point Query Experiments (Main Paper)/JLSketch/src/._.DS_Store
- supplementary-material-linear-and-kernel-heavy-hitters-jan-2022/Point Query Experiments (Main Paper)/JLSketch/src/experiments/
- __MACOSX/supplementary-material-linear-and-kernel-heavy-hitters-jan-2022/Point Query Experiments (Main Paper)/JLSketch/src/._experiments
- supplementary-material-linear-and-kernel-heavy-hitters-jan-2022/Point Query Experiments (Main Paper)/JLSketch/src/topk.cpp
- __MACOSX/supplementary-material-linear-and-kernel-heavy-hitters-jan-2022/Point Query Experiments (Main Paper)/JLSketch/src/._topk.cpp
- supplementary-material-linear-and-kernel-heavy-hitters-jan-2022/Point Query Experiments (Main Paper)/JLSketch/src/logistic_sketch.cpp
- __MACOSX/supplementary-material-linear-and-kernel-heavy-hitters-jan-2022/Point Query Experiments (Main Paper)/JLSketch/src/._logistic_sketch.cpp
- supplementary-material-linear-and-kernel-heavy-hitters-jan-2022/Point Query Experiments (Main Paper)/JLSketch/src/jl_recovery_sketch.cpp
- __MACOSX/supplementary-material-linear-and-kernel-heavy-hitters-jan-2022/Point Query Experiments (Main Paper)/JLSketch/src/._jl_recovery_sketch.cpp
- supplementary-material-linear-and-kernel-heavy-hitters-jan-2022/Point Query Experiments (Main Paper)/JLSketch/src/countsketch.cpp
- __MACOSX/supplementary-material-linear-and-kernel-heavy-hitters-jan-2022/Point Query Experiments (Main Paper)/JLSketch/src/._countsketch.cpp
- supplementary-material-linear-and-kernel-heavy-hitters-jan-2022/Point Query Experiments (Main Paper)/JLSketch/src/hash.cpp
- __MACOSX/supplementary-material-linear-and-kernel-heavy-hitters-jan-2022/Point Query Experiments (Main Paper)/JLSketch/src/._hash.cpp
- supplementary-material-linear-and-kernel-heavy-hitters-jan-2022/Point Query Experiments (Main Paper)/JLSketch/src/logistic.cpp
- __MACOSX/supplementary-material-linear-and-kernel-heavy-hitters-jan-2022/Point Query Experiments (Main Paper)/JLSketch/src/._logistic.cpp
- supplementary-material-linear-and-kernel-heavy-hitters-jan-2022/Point Query Experiments (Main Paper)/JLSketch/src/dataset.cpp
- __MACOSX/supplementary-material-linear-and-kernel-heavy-hitters-jan-2022/Point Query Experiments (Main Paper)/JLSketch/src/._dataset.cpp
- supplementary-material-linear-and-kernel-heavy-hitters-jan-2022/Point Query Experiments (Main Paper)/JLSketch/src/black_box_reduction.cpp
- __MACOSX/supplementary-material-linear-and-kernel-heavy-hitters-jan-2022/Point Query Experiments (Main Paper)/JLSketch/src/._black_box_reduction.cpp
- supplementary-material-linear-and-kernel-heavy-hitters-jan-2022/Point Query Experiments (Main Paper)/JLSketch/src/experiments/json.hpp
- __MACOSX/supplementary-material-linear-and-kernel-heavy-hitters-jan-2022/Point Query Experiments (Main Paper)/JLSketch/src/experiments/._json.hpp
- supplementary-material-linear-and-kernel-heavy-hitters-jan-2022/Point Query Experiments (Main Paper)/JLSketch/src/experiments/cxxopts.hpp
- __MACOSX/supplementary-material-linear-and-kernel-heavy-hitters-jan-2022/Point Query Experiments (Main Paper)/JLSketch/src/experiments/._cxxopts.hpp
- supplementary-material-linear-and-kernel-heavy-hitters-jan-2022/Point Query Experiments (Main Paper)/JLSketch/src/experiments/classification.cpp
- __MACOSX/supplementary-material-linear-and-kernel-heavy-hitters-jan-2022/Point Query Experiments (Main Paper)/JLSketch/src/experiments/._classification.cpp
