# Supplementary material
Source: ML conference proceedings conference paper supplement (https://proceedings.neurips.cc/paper_files/paper/2021/hash/78ccad7da4c2fc2646d1848e965794c5-Abstract.html)
Supplement: Supplementary file 1 [file 78ccad7da4c2fc2646d1848e965794c5-Supplemental.zip › supplementary-material-linear-and-kernel-heavy-hitters-jan-2022/Appendix F Experiments/download_datasets]

download_data:
	curl https://www.csie.ntu.edu.tw/~cjlin/libsvmtools/datasets/binary/rcv1_test.binary.bz2 -o rcv1_test.binary.bz2
	bzip2 -dk rcv1_test.binary.bz2
	curl https://www.csie.ntu.edu.tw/~cjlin/libsvmtools/datasets/binary/kdda.bz2 -o kdda.bz2
	bzip2 -dk kdda.bz2
	curl https://www.csie.ntu.edu.tw/~cjlin/libsvmtools/datasets/binary/url_combined.bz2 -o url_combined.bz2
	bzip2 -dk url_combined.bz2

delete_datasets:
	rm rcv1_test.binary.bz2
	rm rcv1_test.binary
	rm kdda.bz2
	rm kdda
	rm url_combined.bz2
	rm url_combined
