# Supplementary material
Source: ML conference proceedings conference paper supplement (https://proceedings.neurips.cc/paper_files/paper/2021/hash/78ccad7da4c2fc2646d1848e965794c5-Abstract.html)
Supplement: Supplementary file 1 [file 78ccad7da4c2fc2646d1848e965794c5-Supplemental.zip › supplementary-material-linear-and-kernel-heavy-hitters-jan-2022/Appendix F Experiments/README]

This folder contains the code to obtain the results shown in Appendix F of our paper. dataset.py and online_logistic_regression.py are based on parts of https://github.com/stanford-futuredata/wmsketch.

To download the RCV1 dataset to this folder, run the following command:
$ make -f download_datasets download_data

To delete all the datasets from this folder after downloading, run the following command:
$ make -f download_datasets delete_datasets

To obtain the results shown in Appendix F, run the following command after downloading the RCV1 dataset:
$ python3 main.py
