# Supplementary material
Source: ML conference proceedings conference paper supplement (https://proceedings.neurips.cc/paper_files/paper/2021/hash/78ccad7da4c2fc2646d1848e965794c5-Abstract.html)
Supplement: Supplementary file 1 [file 78ccad7da4c2fc2646d1848e965794c5-Supplemental.zip › supplementary-material-linear-and-kernel-heavy-hitters-jan-2022/Point Query Experiments (Main Paper)/JLSketch/CMakeLists.txt]

cmake_minimum_required(VERSION 3.8)
project(wmsketch)

set(CMAKE_CXX_STANDARD 14)

set(SOURCE_FILES
        src/countsketch.cpp
        src/dataset.cpp
        src/hash.cpp
        src/jl_recovery_sketch.cpp
        src/black_box_reduction.cpp
        src/logistic.cpp
        src/logistic_sketch.cpp
        src/topk.cpp
        src/util.cpp)

add_library(wmsketch ${SOURCE_FILES})
target_include_directories(wmsketch PUBLIC include)

add_executable(wmsketch_classification
        src/experiments/cxxopts.hpp
        src/experiments/json.hpp
        src/experiments/classification.cpp)
target_link_libraries(wmsketch_classification wmsketch)
