# Supplementary material
Source: ML conference proceedings conference paper supplement (https://proceedings.neurips.cc/paper_files/paper/2021/hash/78ccad7da4c2fc2646d1848e965794c5-Abstract.html)
Supplement: Supplementary file 1 [file 78ccad7da4c2fc2646d1848e965794c5-Supplemental.zip › supplementary-material-linear-and-kernel-heavy-hitters-jan-2022/Point Query Experiments (Main Paper)/JLSketch/include/binary_estimator.h]

#ifndef BINARY_ESTIMATOR_H_
#define BINARY_ESTIMATOR_H_

#include <cstdlib>
#include <cstdint>

namespace wmsketch {

class BinaryEstimator {
 public:
  virtual ~BinaryEstimator() = default;
  virtual float get(uint32_t key) = 0;
  virtual bool update(uint32_t key, bool pos) = 0;
  virtual bool update(const std::vector<std::pair<uint32_t, float> >& x, bool pos) = 0;
  virtual bool update(std::vector<float>& new_weights, const std::vector<std::pair<uint32_t, float> >& x, bool pos) = 0;
  virtual float bias() = 0;
};

} // namespace wmsketch

#endif /* BINARY_ESTIMATOR_H_ */
