# Supplementary material
Source: ML conference proceedings conference paper supplement (https://proceedings.neurips.cc/paper_files/paper/2021/hash/78ccad7da4c2fc2646d1848e965794c5-Abstract.html)
Supplement: Supplementary file 1 [file 78ccad7da4c2fc2646d1848e965794c5-Supplemental.zip › supplementary-material-linear-and-kernel-heavy-hitters-jan-2022/Point Query Experiments (Main Paper)/JLSketch/include/jl_recovery_sketch.h]

/*
 * jl_recovery_sketch.h:
 * Logistic regression using sparse JL sketch.
 * Recovery done by multiplying by R^T where
 * R is a sparse JL matrix.
 */

#ifndef JL_RECOVERY_SKETCH_H_
#define JL_RECOVERY_SKETCH_H_

#include <vector>
#include "binary_estimator.h"
#include "hash.h"

namespace wmsketch {

class JLRecoverySketch : public BinaryEstimator {

public:
	static const uint32_t MAX_LOG2_WIDTH = 31;

private:
	float** weights_;
	float bias_;
	const float lr_init_;
	const float l2_reg_;
	float scale_;
	uint64_t t_;
	const uint32_t depth_;
	uint32_t width_mask_;
	hash::TabulationHash hash_fn_;
	std::vector<uint32_t> hash_buf_;
	std::vector<float> weight_sums_;

public:
	JLRecoverySketch(
			uint32_t log2_width,
			uint32_t depth,
			int32_t seed,
			float lr_init = 0.1,
			float l2_reg = 1e-3);
	~JLRecoverySketch() override;
	float get(uint32_t key) override;
	bool predict(uint32_t key);
	bool predict(const std::vector<std::pair<uint32_t, float>>& x);
	bool update (uint32_t key, bool label) override;
	bool update(const std::vector<std::pair<uint32_t, float>>& x, bool label) override;
	bool update(std::vector<float>& new_weights, const std::vector<std::pair<uint32_t, float>>& x, bool label) override;
	float bias() override;
	float scale();

private:
	float get_weight(uint32_t key);
	void get_weights(const std::vector<std::pair<uint32_t, float>>& x);
	float dot(const std::vector<std::pair<uint32_t, float>>& x);
};

}

#endif
