# Supplementary material
Source: ML conference proceedings conference paper supplement (https://proceedings.neurips.cc/paper_files/paper/2021/hash/78ccad7da4c2fc2646d1848e965794c5-Abstract.html)
Supplement: Supplementary file 1 [file 78ccad7da4c2fc2646d1848e965794c5-Supplemental.zip › supplementary-material-linear-and-kernel-heavy-hitters-jan-2022/Point Query Experiments (Main Paper)/JLSketch/include/util.h]

/*
 * Utility functions.
 */

#ifndef UTIL_H_
#define UTIL_H_

#include <cstdlib>
#include <cstdint>
#include <climits>
#include <stdexcept>
#include <vector>

#define MIN(x, y) ((x) < (y) ? (x) : (y))
#define MAX(x, y) ((x) > (y) ? (x) : (y))

namespace wmsketch {

void tic(uint64_t& s);
uint64_t toc(uint64_t s);

float mean(const std::vector<float>& buf);
float median(std::vector<float>& buf);

float sigmoid(float x);
float logistic_loss(float x);
float logistic_grad(float x);

} // namespace wmsketch

#endif /* UTIL_H_ */
